# Supplementary material
Source: PubMed Central journal article supplement (PMC5518901)
Supplement: npp201723x1.pdf [file npp201723x1.pdf]

### A Experiment 1

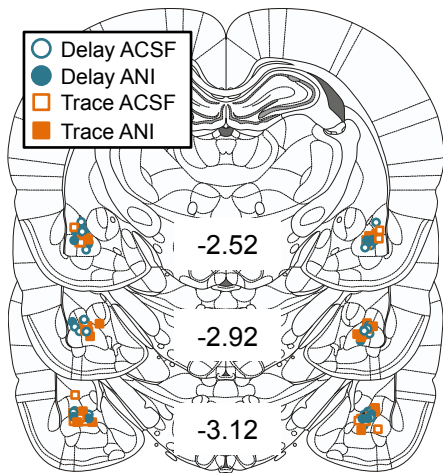

### B Experiment 2

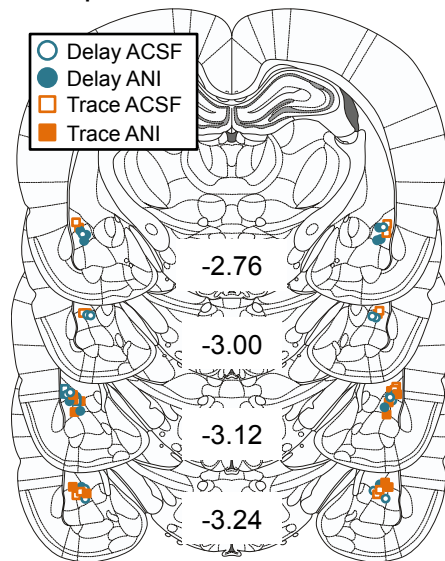

### C Experiment 3

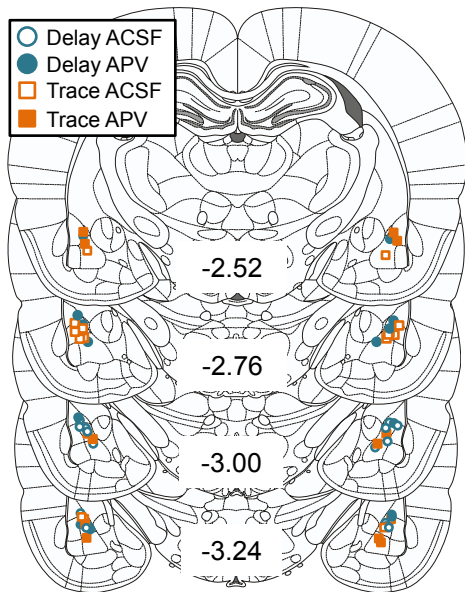

### D Experiment 4

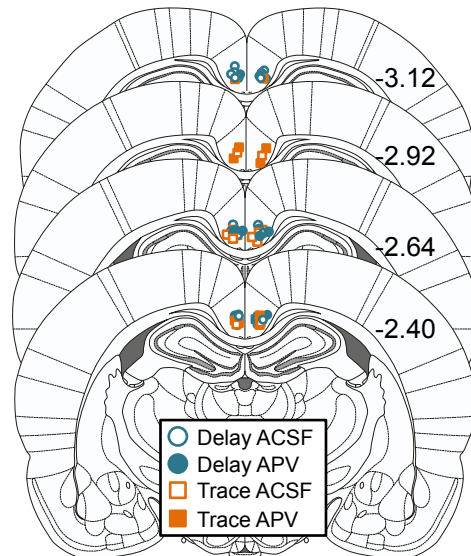

**Supplementary Figure 1. Histology for all experiments. (A)** Histology from Experiment 1. **(B)** Experiment 2. **(C)** Experiment 3. **(D)** Experiment 4.

### A Experiment 1 training

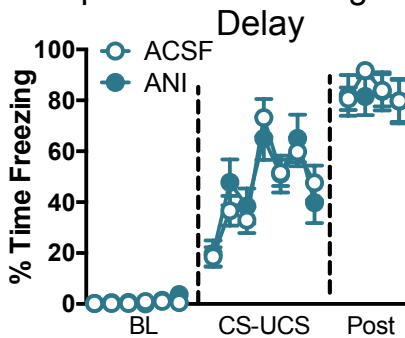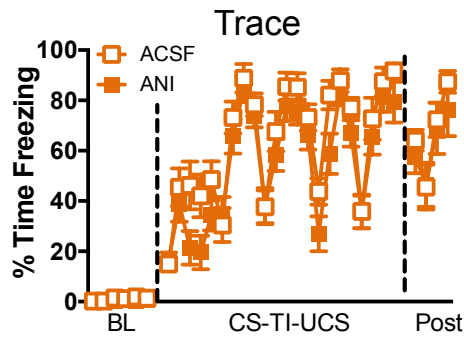

### B Experiment 2 training

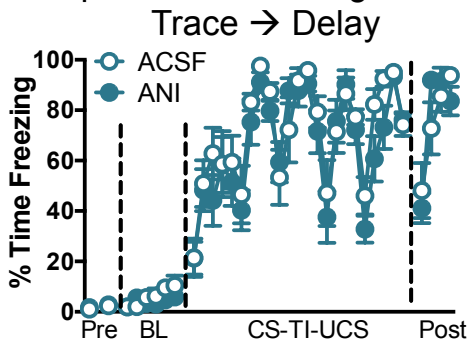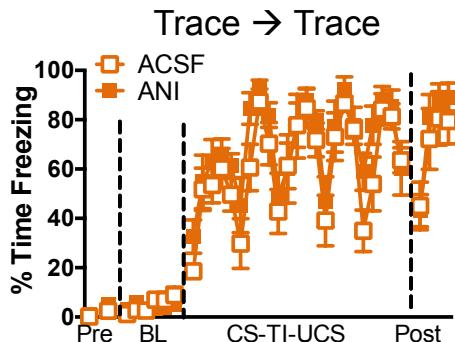

### C Experiment 3 training

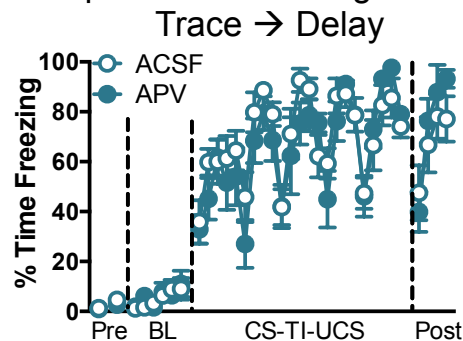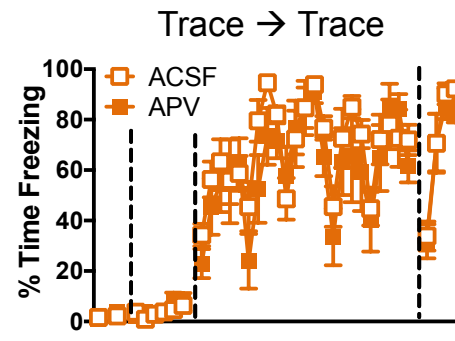

### D Experiment 4 training

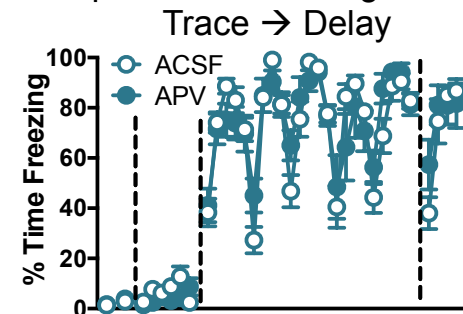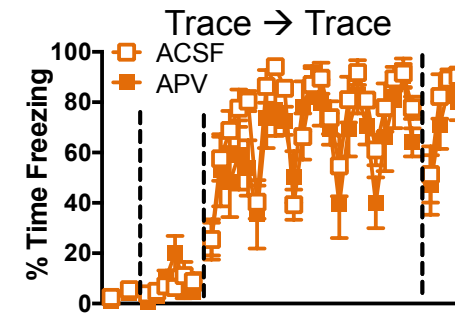

**Supplementary Figure 2.** Acquisition data for all experiments. **(A)** Experiment 1. **(B)** Experiment 2. **(C)** Experiment 3. **(D)** Experiment 4.

## A Extinction Timecourse

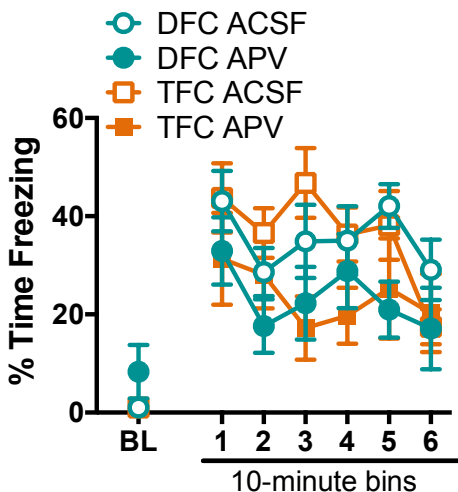

## B Extinction Difference Score

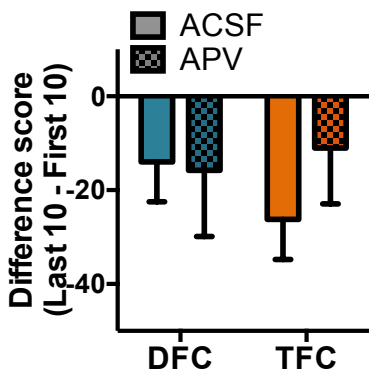

**Supplementary Figure 3.** Extinction data for Experiment 3. **A.** Freezing during extinction session, shown in 10-minute bins. **B.** Extinction difference score (the last 10 min – the first 10 min of EXT) for each group. All groups froze less during the last 10 minutes than the first 10 minutes of extinction.
